# Supplementary material for: Humoral Response among Patients with Interstitial Lung Disease Vaccinated with the BNT162b2 SARS-Cov-2 vaccine - A Prospective Cohort Study
Source: Research Square preprint supplement (doi:10.21203/rs.3.rs-1201596/v1), 2021-12-29

Supplementary material

Table S1: Baseline characteristics and antibody titers among patients treated with anti-fibrotic treatment and anti-fibrotic treatment

|  | **Anti-inflammatory Tx**  **(n=29)** | **Anti-fibrotic Tx**  **(n=40)** | **P value** |
| --- | --- | --- | --- |
| **Age** | 63.9±12.51 | 71.03±8.00 | 0.01 |
| **Median (IQR) Au/ml** | 39.60 (4.25-165) | 361.10 (207-811) | <0.001 |
| **GMT** | 23.70±12.73 | 441.26±3.15 | <0.001 |
| **Adequate humoral response (%)** | 14 (48.3) | 40 (100) | <0.001 |
| **Time from 2nd vaccine (days)** | 173.48±18.81 | 172.08±16.04 | 0.73 |


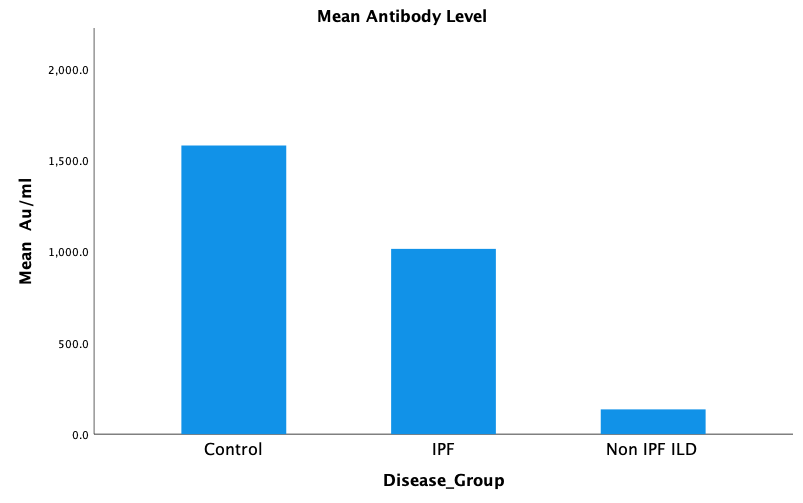


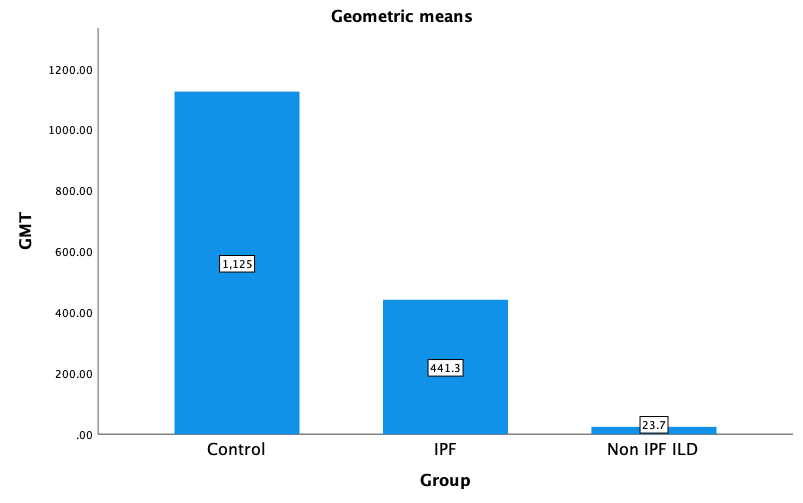


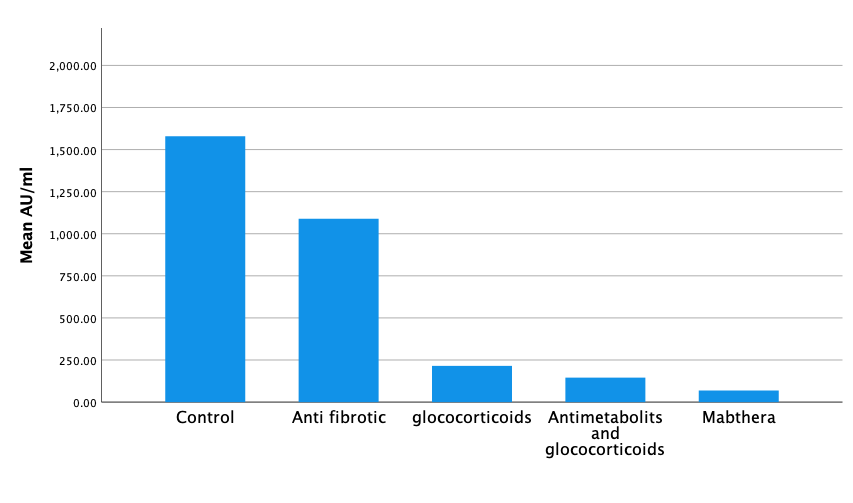


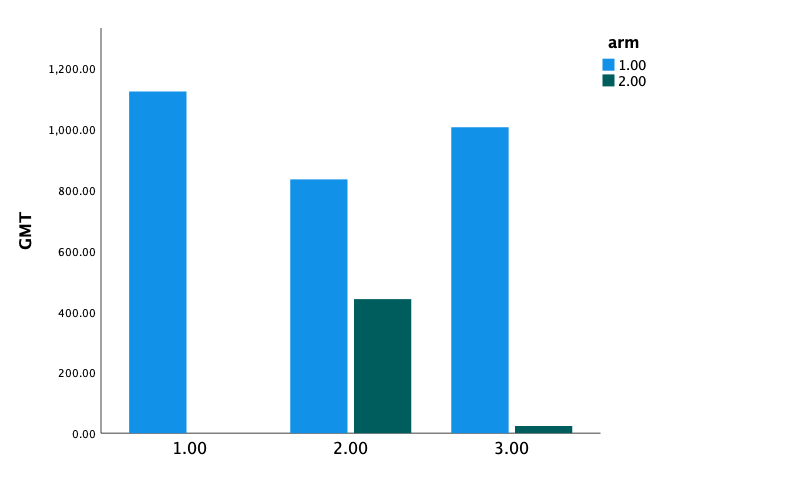


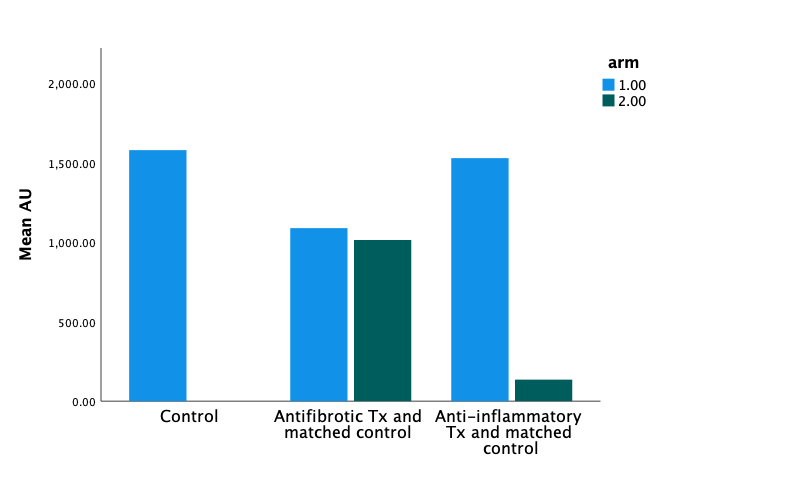


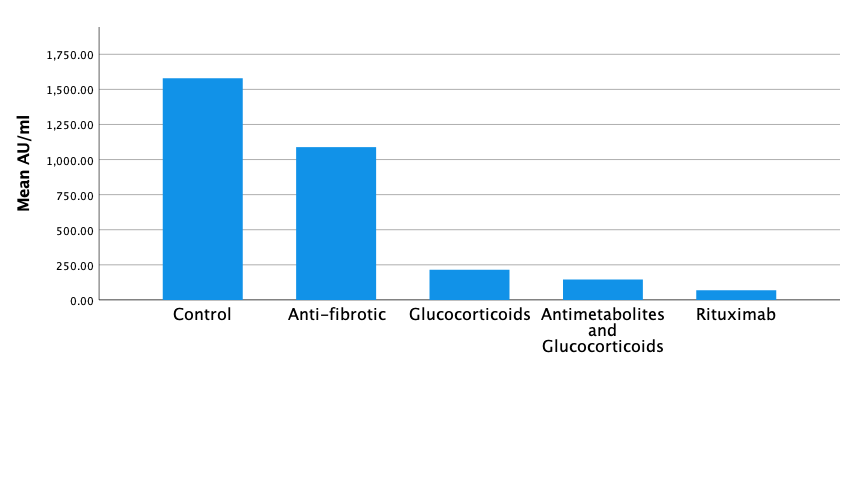

Supplement: Supplementary file 1 [file e1519f1a6bbad3764170901a.docx]
